# Supplementary material for: Characterization of trade-offs between immunity and reproduction in the coral species Astrangia poculata
Source: PeerJ journal article supplement (doi:10.7717/peerj.16586), 2023-12-04

**Symbiotic Density**  
(cells/area)

4e<sup>5</sup>  
3e<sup>5</sup>  
2e<sup>5</sup>  
1e<sup>5</sup>  
0

White

Brown

**Symbiotic State**

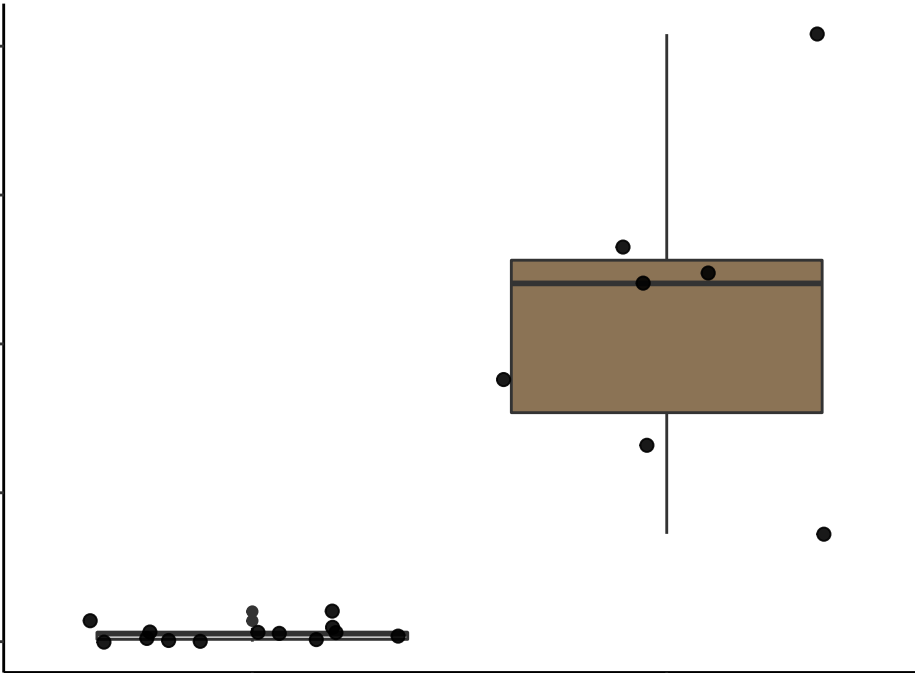

Supplement: SuppFig1.pdf [file SuppFig1.pdf]
