# Supplementary material for: Characterization of trade-offs between immunity and reproduction in the coral species Astrangia poculata
Source: PeerJ. 2023 Dec 4;11:e16586. doi: 10.7717/peerj.16586 (PMC10702360; doi:10.7717/peerj.16586)
Supplement: Supplemental Information 2 — Readme and raw data collected and analyzed as part of the experiment. Readme explains each measured value including units and collection parameters. [file peerj-11-16586-s002.xls]

## Sheet: MetaData
Metadata and information for raw data associated with Villafranca et. al manuscript
Column Title	Description
sample ID	sample identifier
type	original colony identification based on coloration (white or brown)
protein_conc	sample proteinc concentration measured as mg protein/mg extract
cat_stand	standardized catalase activity; measured as H202 scavanged per minute per mg protein
pox_stand	standardized peroxidase activity; measured as activity per minute per mg protein
ppo_stand	total phenoloxidase activity; measured as activity per minute per mg protein
dt	antibacterial activity; measured as bacterial doubling time from exponentional growth phase
mel_stand	standardized melanin concentration; measured as mg melanin per mg dry tissue weight
lipid_stand	standardized lipid concentration; measured as total lipids per mg dry tissue weight
carb_stand	standardized carbohydrate concentration; measured as total carbohydrates per mg dry tissue weight
spermcount	sperm counts from hemacytometer; 3 replicate counts were conducted
symcount	symbiont counts from hemacytometer; 3 replicate counts were conducted
symbiont_stand	symbiont density standardized by tissue area (symbionts/cm)
size	sampled colony size in cm
polyp count	number of polyps per colony; counted in triplicate

## Sheet: Raw_Data
sample_id	type	protein_conc	cat_stand	pox_stand	ppo_stand	dt	mel_stand	lipid_stand	carb_stand	spermcount1	spermcount2	spermcount3	symcount1	symcount2	symcount3	symbiont_stand	size	polypcount1	polypcount2	polypcount3
RI23	White	0.192232	803.875	1.82071	0.277442	3.64183	0.00010456	0.00799809	0.00192269	10	7	7	2	0	0	1557.63	11.899	38	33	36
RI25	Brown	0.154808	1521.56	1.45342	0.236853	3.07061	4.38473e-05	0.00453012	0.00305363	39	110	99	41	60	68	131620	31.303	45	42	45
S30	White	0.196391	1824.84	1.27297	0.203676	2.96101	3.78216e-05	0.00538869	0.00318481	109	113	144	4	4	4	9345.79	41.484	69	70	62
RI35	Brown	0.171441	1388.64	2.45469	0.311089	3.16006	6.38416e-05	0.00972581	0.00352955	3	5	2	75	79	72	176012	15.896	37	36	32
RI36	White	0.267082	1204.04	2.26211	0.274573	3.68477	0.000136674	0.0105288	0.0146275	295	292	226	3	1	1	3894.08	22.924	39	40	34
RI38	White	0.185995	1306.07	0.918485	0.43012	3.90638	3.46485e-05	0.0116275	0.00805788	44	27	38	4	3	1	6230.53	14.018	53	52	52
RI39	Brown	0.190153	1291.13	0.284858	0.0876487	3.46071	5.83967e-05	0.00774	0.00746603	2	3	5	28	35	30	72429.9	26.171	48	42	40
RI40	Brown	0.179757	1065.19	0.649023	0.63048	3.61574	0.00012137	0.00818555	0.00893634	163	143	178	100	86	123	240654	10.08	26	27	24
RI41	Brown	0.190153	1717.07	0.788838	0.262946	3.42463	0.000122381	0.00773891	0.0040116	13	7	13	112	116	112	264798	30.422	36	34	35
RI43	White	0.154808	1792.05	4.11802	0.430642	3.31877	8.20667e-05	0.00763302	0.00581686	10	4	4	4	5	9	14018.7	9.01	27	24	23
RI45	White	0.213024	1083.39	3.22734	0.156477	3.10406	5.3657e-05	0.00538869	0.00238221	12	16	13	1	3	3	5451.71	24.556	49	52	44
RI47	White	0.219261	1299.09	3.32556	0.212836	3.97074	6.23852e-05	0.00978136	0.00857248	185	325	179	2	3	3	6230.53	61.628	85	82	92
RI49	White	0.22134	1497.3	0.922411	0.248486	3.63003	6.97344e-05	0.00834286	0.00722211	5	13	12	14	9	3	20249.2	34.917	32	33	37
RI50	White	0.190153	1536.67	1.0737	0.210357	4.06327	2.31272e-05	0.00190923	0.00644763	26	49	30	4	2	2	6230.53	29.35	43	46	38
RI51	White	0.231736	1601.13	2.24753	0.107881	3.34416	0.000537765	0.0109558	0.00834712	346	545	290	0	0	0	0	16.032	60	57	58
RI53	White	0.208865	1527.62	1.23684	0.191511	3.88954	5.98649e-05	0.0177277	0.0117448	254	574	313	3	0	0	2336.45	26.496	50	45	48
RI54	White	0.248369	985.367	1.8957	0.583808	3.30706	5.56933e-05	0.00882396	0.00633302	545	674	510	0	0	0	0	29.485	50	49	45
RI55	White	0.235894	1936.63	7.66586	0.508702	3.1548	0.00013933	0.0111447	0.0152337	27	62	92	1	0	0	778.816	9.979	18	16	16
RI58	Brown	0.175599	1621.97	2.79994	0.14237	3.21218	0.000115214		0.00730377	499	422	526	197	177	150	408100	18.269	44	34	37
RI61	Brown	0.177678	1713.9	0.492463	0.196985	3.76183	0.000138128	0.00954343	0.0101545	12	16	13	96	127	95	247664	5.438	25	21	20
